# Supplementary material for: Comparison of the Prognostic Value of Global and Regional Myocardial Flow Capacity Radius, Myocardial Flow Reserve, and Stress Myocardial Blood Flow Using Rubidium-82 with SiPM PET/CT
Source: Research Square preprint supplement (doi:10.21203/rs.3.rs-1122028/v1), 2021-12-02

**Online Tables**

**Table E1** Prediction of major adverse cardiovascular events (MACE) during follow-up. Univariable Cox proportional regression models with covariates as continuous variables

|  | MACE | |
| --- | --- | --- |
| Hazard ratio (95% CI) | p-value |
| Global MFR | 2.24 (1.5-3.3) | <0.001 |
| Global stress MBF | 2.21 (1.5-3.2) | <0.001 |
| Global MFC radius | 1.88 (1.4-2.5) | <0.001 |
| Minimum regional MFR | 2.34 (1.6-3.5) | <0.001 |
| Minimum regional stress MBF | 2.32 (1.6-3.4) | <0.001 |
| Minimum regional MFC radius | 1.98 (1.5-2.7) | <0.001 |

MFR – myocardial flow reserve; MBF – Myocardial blood flow; MFC – myocardial flow capacity

**Table E2** Comparison between adjusted models (along with covariates: male gender, known coronary artery disease (CAD) and history of myocardial infarction) using a likelihood ratio chi-square test

|  | p-value | |
| --- | --- | --- |
| With MFR, stress MBF and MFC radius as binary variables | With MFR, stress MBF and MFC radius as continuous variables |
| Global |  | |
| MFR vs. MFR + MFC | 0.061 | 0.16 |
| Stress MBF vs. stress MBF + MFC | 0.087 | 0.16 |
| Stress MBF vs. stress MBF + MFR | 0.04 | 0.15 |
| MFR vs. MFR + stress MBF | 0.004 | 0.15 |
| Minimum regional |  | |
| MFR vs. MFR + MFC | 0.023 | 0.083 |
| Stress MBF vs. stress MBF + MFC | 0.016 | 0.13 |
| Stress MBF vs. stress MBF + MFR | 0.026 | 0.17 |
| MFR vs. MFR + stress MBF | 0.019 | 0.12 |
| Global + Minimum regional |  |  |
| Global MFR vs. Global MFR + Minimum regional MFR | 0.40 | > 0.9 |
| Global stress MBF vs. Global stress MBF + Minimum regional stress MBF | 0.65 | 0.56 |
| Global MFC vs. Global MFC + Minimum regional MFC | 0.078 | 0.51 |

MFR – myocardial flow reserve; MBF – Myocardial blood flow; MFC – myocardial flow capacity

**Online Figures**

**Fig. E1** MACE-free Survival Curves (n = 234) According to Global and Regional MFR and stress MBF, based on thresholds using the Youden Index. (A) Global MFR, (B) Global stress MBF, (C) Minimum regional MFR, (D) Minimum regional stress MBF


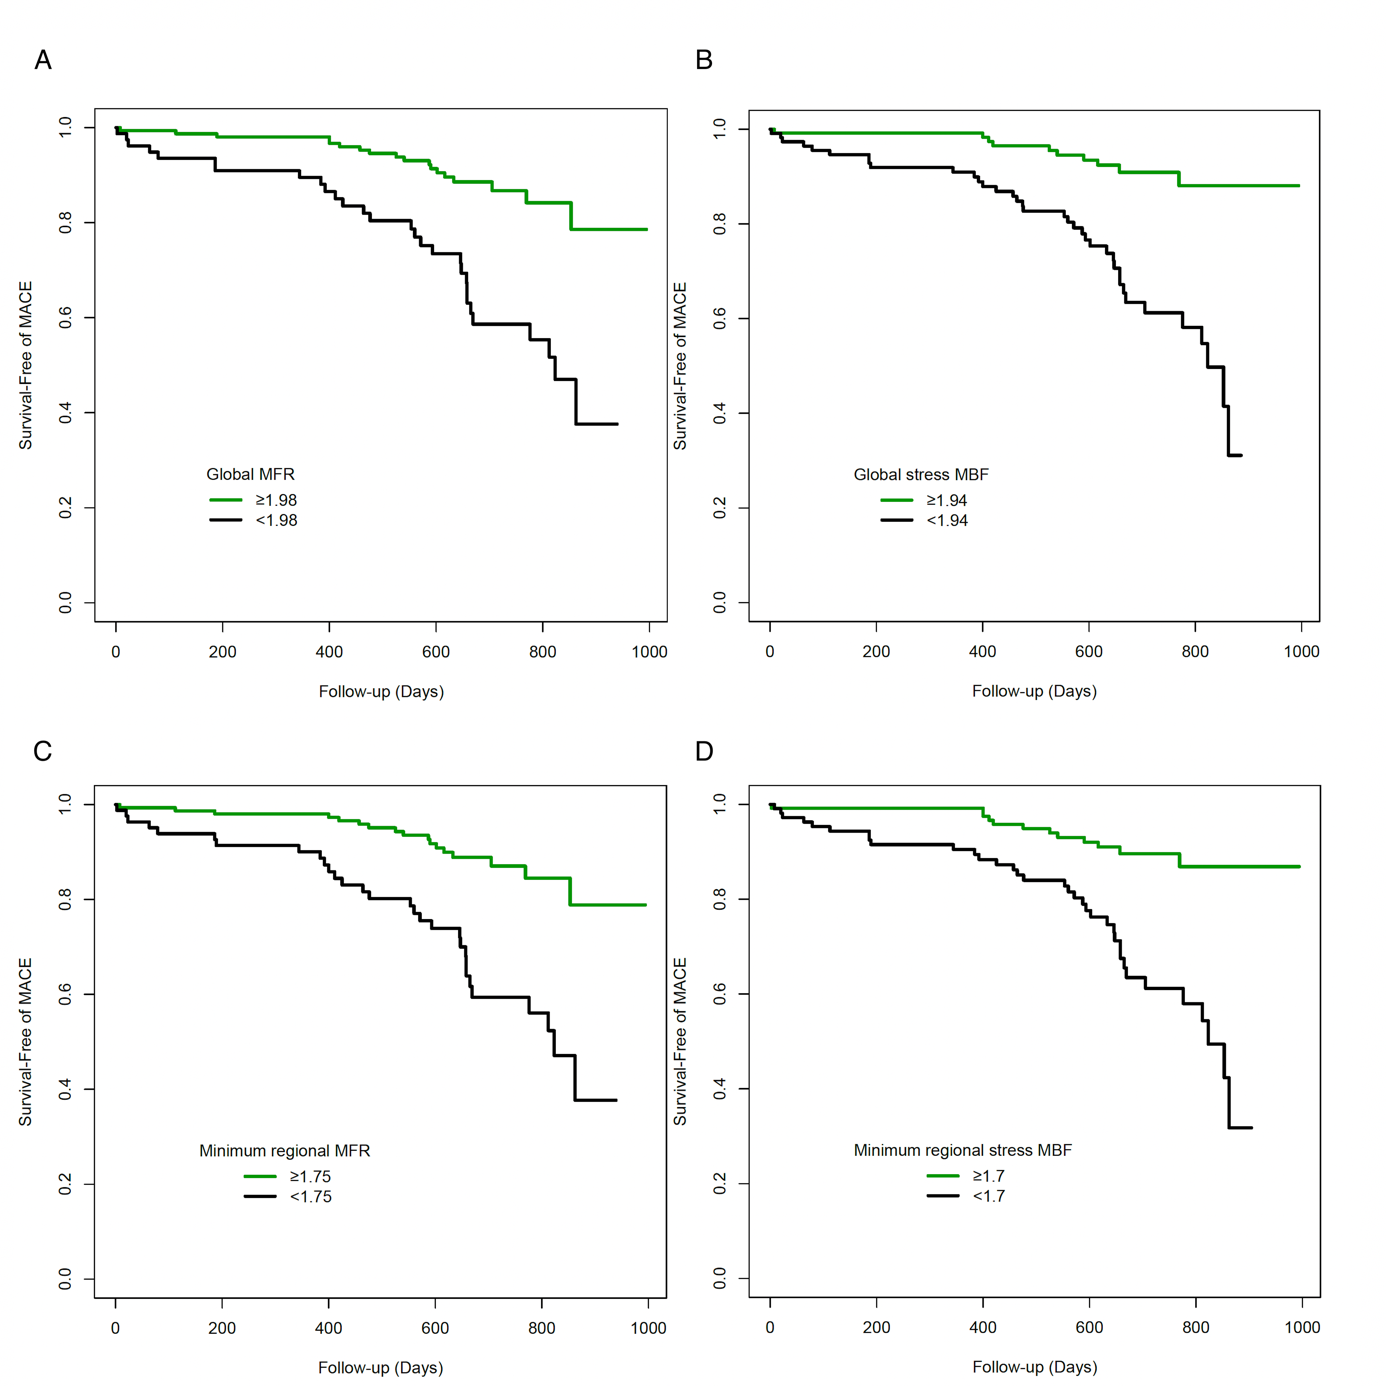


**Fig. E2** MACE-free Survival Curves (n = 234) According to Global and Regional MFC radius, based on thresholds using the Youden Index. (A) Global MFC radius, (B) Minimum regional MFC radius


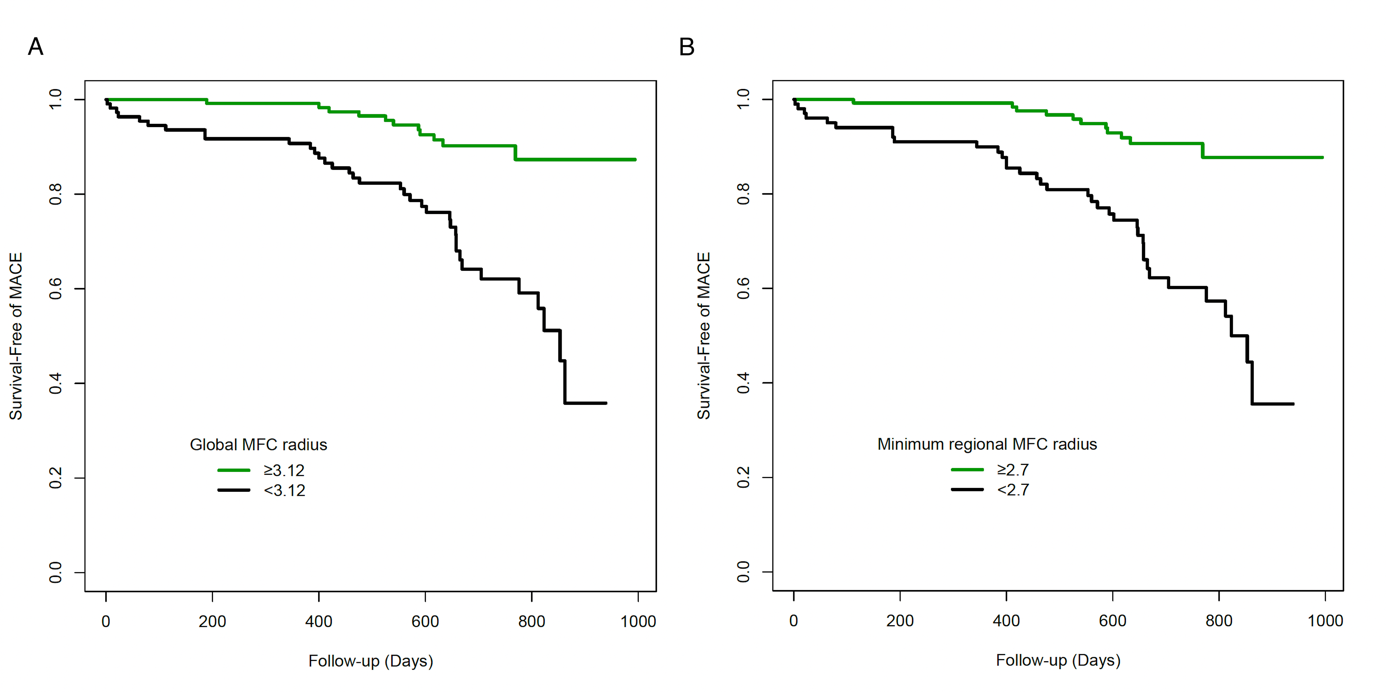


**Fig. E3** Predictors of MACE on Cox Proportional Hazards Modeling models with MFR, stress MBF and MFC radius as continuous variables**.** Forest plots of hazard ratios derived from multivariable modeling with 95% confidence intervals for global MFR (A), global stress MBF (B), global MFC radius (C), minimum regional MFR (D), minimum regional stress MBF (E), and minimum regional MFC radius (F), along with covariates: male gender, known CAD, and history of myocardial infarction


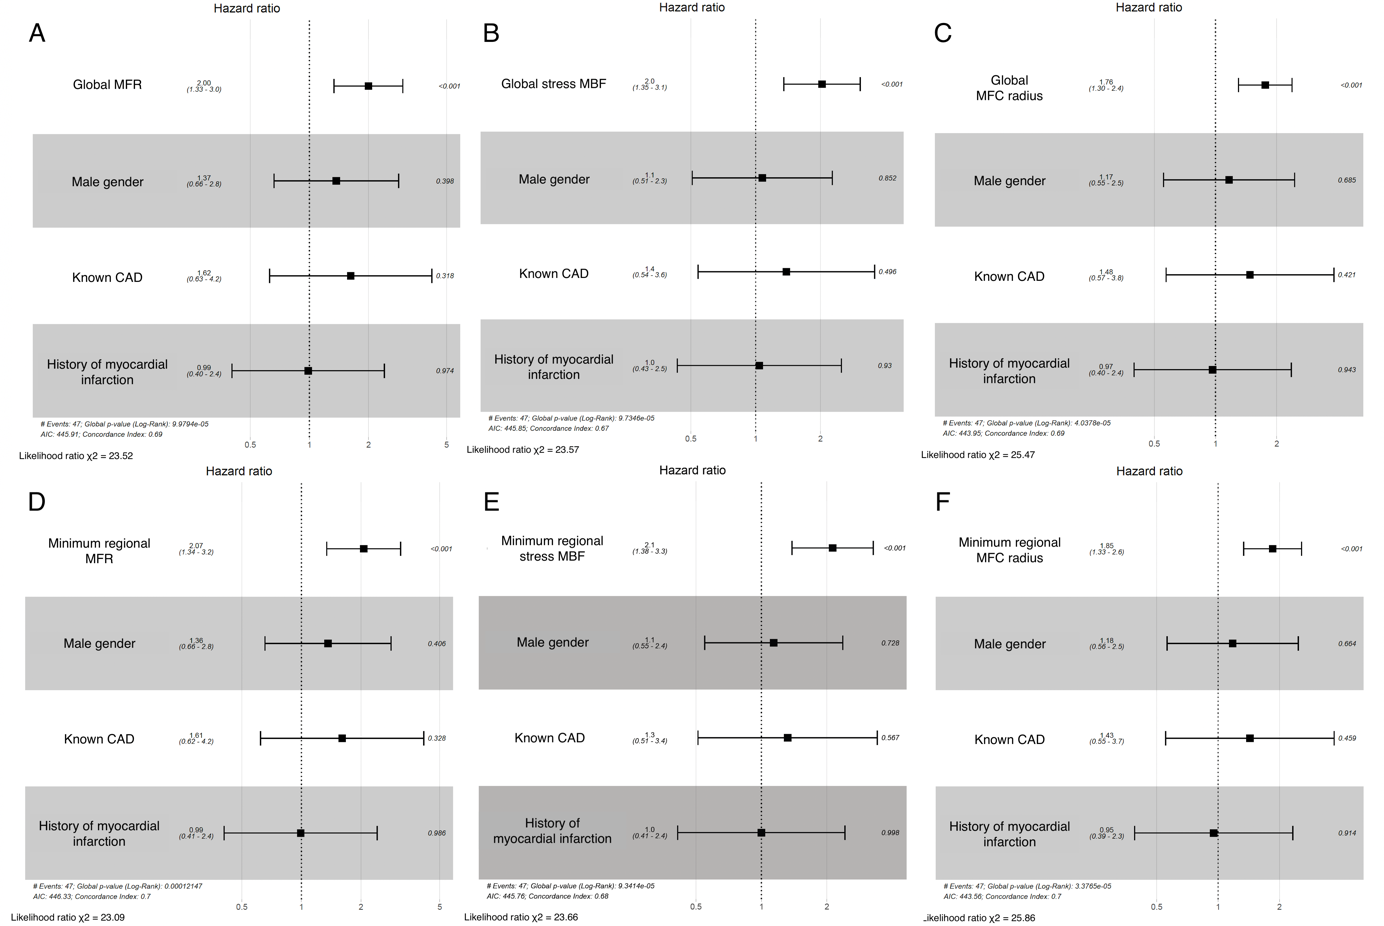

Supplement: Supplementary file 1 [file 04453a30b8fda0852d678a31.docx]
